# Supplementary material
Source: Frontiers journal article supplement (https://www.frontiersin.org/articles/502309)

Supplemental figure 1. Scree plot displaying within cluster Sums of Squared Errors (y-axis) and number of clusters (x-axis) from K-means cluster analysis of data from Cuatro Santos Health and Demographic Surveillance System, 2014

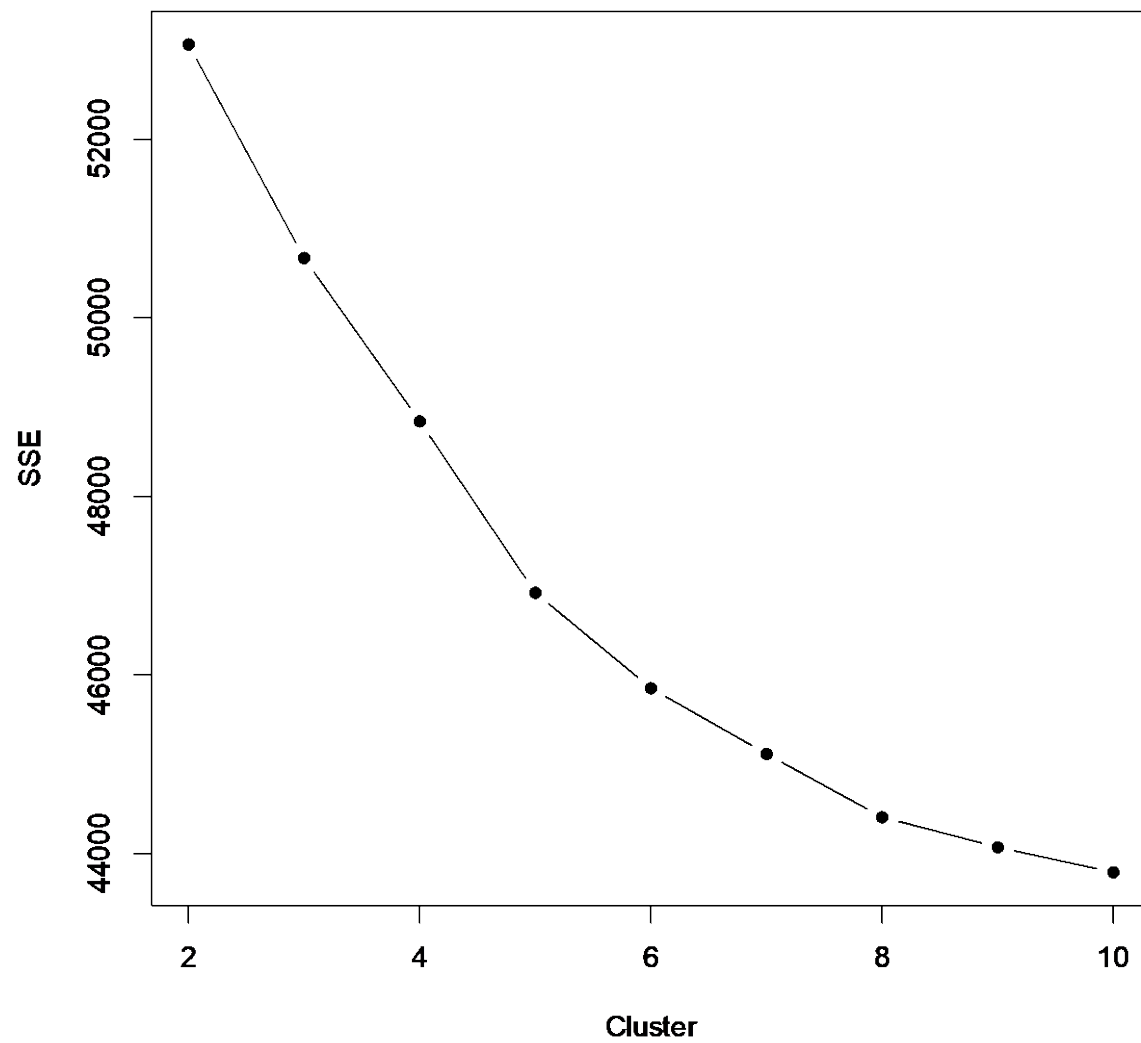

Supplement: Image_1.pdf [file Image_1.pdf]
